# Supplementary material for: El Niño Southern Oscillation and Leptospirosis Outbreaks in New Caledonia
Source: PubMed Central journal article supplement (PMC3990495; doi:10.1371/journal.pntd.0002798), 2014-04-17
Supplement: pntd.0002798.s001.pdf [file pntd.0002798.s001.pdf]

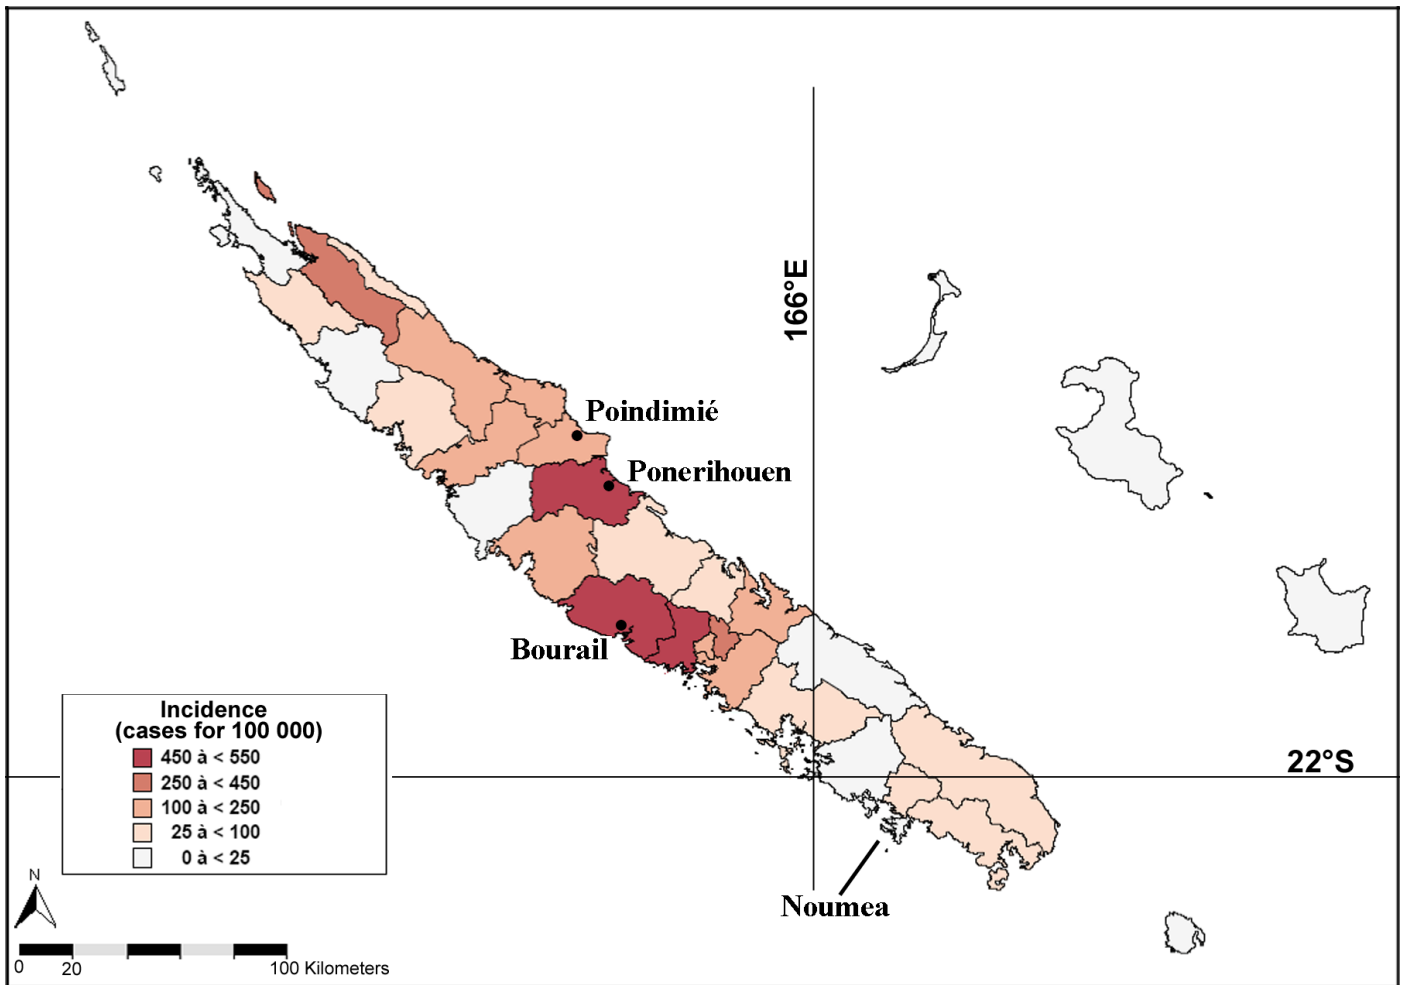

**Figure S1:** Incidence of leptospirosis during the epidemic year 2008 in New Caledonia and location of the meteorological stations used in this study.
