# Supplementary material for: El Niño Southern Oscillation and Leptospirosis Outbreaks in New Caledonia
Source: PubMed Central journal article supplement (PMC3990495; doi:10.1371/journal.pntd.0002798), 2014-04-17
Supplement: pntd.0002798.s003.pdf [file pntd.0002798.s003.pdf]

Table S2. Correlation between El Niño indices and rainfall and temperature data from the same month in three locations in New Caledonia.

|                             | Sea surface temperature anomaly<br>(Box 4) | Oceanic Niño Index (ONI) |
|-----------------------------|--------------------------------------------|--------------------------|
| Rainfall                    |                                            |                          |
| Ponerihouen                 | -0.30 (-0.44, -0.15)                       | -0.32 (-0.44, -0.15)     |
| Poindimie                   | -0.35 (-0.48, -0.21)                       | -0.37 (-0.48, -0.20)     |
| Bourail                     | -0.22 (-0.37, -0.07)                       | -0.23 (-0.37, -0.07)     |
| Mean maximum<br>temperature |                                            |                          |
| Ponerihouen                 | -0.47 (-0.58, -0.34)                       | -0.52 (-0.45, -0.16)     |
| Poindimie                   | -0.43 (-0.55, -0.29)                       | -0.51 (-0.58, -0.33)     |
| Bourail                     | -0.31 (-0.46, -0.16)                       | -0.32 (-0.44, -0.16)     |

Values are Pearson partial correlation coefficient with 95% confidence intervals (Fisher), estimated when controlling for sine and cosine terms with a 12-month period. Correlation between ONI and sea surface temperature anomaly is 0.96.
